# Supplementary material
Source: publisher figshare collection journal article supplement (https://acs.figshare.com/ndownloader/files/4258870)
Supplement: Supplementary file 1 [file 4258870]

Manuscript Title : Prediction of Aqueous Solubility, Vapor Pressure and Critical Micelle Concentration for Aquatic Partitioning of Perfluorinated Chemicals

Manuscript No. : es-2010-01181g

Authors : Barun Bhattacharai, Paola Gramatica\*

### ***Contents***

#### Tables

| S.No. | Title                                                                                                                                                                  | Page |
|-------|------------------------------------------------------------------------------------------------------------------------------------------------------------------------|------|
| 1.    | Datasets of studied endpoints with experimental and predicted data. The compounds within the Applicability Domain are specified.                                       | 02   |
| 2.    | Performances of the models for data belonging to Aqueous Solubility (AqS), Vapor Pressure (VP) and Critical Micelle Concentration (CMC) based on descriptors observed. | 08   |
| 3.    | Exp. (in bold) + Pred. data and PCA loading for three properties                                                                                                       | 09   |

#### Documents

| S.No. | Title                                                                               | Page |
|-------|-------------------------------------------------------------------------------------|------|
| 1.    | Abbreviations                                                                       | 14   |
| 2.    | Vapor pressure data preparation.                                                    | 15   |
| 3.    | Available data for PFCs located at the lower-right portion of PCA plot (Figure 1A). | 15   |
